# Supplementary material for: Xanomeline displays concomitant orthosteric and allosteric binding modes at the M4 mAChR
Source: PubMed Central journal article supplement (PMC10482975; doi:10.1038/s41467-023-41199-5), 2023-09-06
Supplement: 41467_2023_41199_MOESM1_ESM.pdf [file 41467_2023_41199_MOESM1_ESM.pdf]

## Supplemental Information

# Xanomeline displays concomitant orthosteric and allosteric binding modes at the M<sub>4</sub> mAChR

Wessel A.C. Burger<sup>1,2,\*</sup>, Vi Pham<sup>1,\*</sup>, Ziva Vuckovic<sup>1,\*</sup>, Alexander S. Powers<sup>3,4\*</sup>, Jesse I. Mobbs<sup>1,2</sup>, Yianni Laloudakis<sup>3</sup>, Alisa Glukhova<sup>1,2</sup>, Denise Wootten<sup>1,2</sup>, Andrew B. Tobin<sup>5</sup>, Patrick M. Sexton<sup>1,2</sup>, Steven M. Paul<sup>6</sup>, Christian C. Felder<sup>6</sup>, Radostin Danev<sup>7</sup>, Ron O. Dror<sup>4,#</sup>, Arthur Christopoulos<sup>1,2,8,#</sup>, Celine Valant<sup>1,#</sup>, and David M. Thal<sup>1,2,#</sup>

1 Drug Discovery Biology, Monash Institute of Pharmaceutical Sciences, Monash University, Parkville, VIC 3052, Australia.

2 Australian Research Council Centre for Cryo-Electron Microscopy of Membrane Proteins, Monash Institute of Pharmaceutical Sciences, Monash University, Parkville, VIC 3052, Australia.

3 Department of Chemistry, Stanford University, Stanford, CA 94305, USA.

4 Departments of Computer Science, Structural Biology, and Molecular and Cellular Physiology, Stanford University, Stanford, CA 94305, USA.

5 The Advanced Research Centre (ARC), School of Biomolecular Sciences, College of Medical, Veterinary and Life Sciences, University of Glasgow, Glasgow G12 8QQ, United Kingdom.

6 Karuna Therapeutics, Boston, Massachusetts 02110, United States.

7 Graduate School of Medicine, University of Tokyo, N415, 7-3-1 Hongo, Bunkyo-ku, 113-0033 Tokyo, Japan.

8 Neuromedicines Discovery Centre, Monash University, Parkville, VIC 3052, Australia.

\* These authors contributed equally.

# Correspondence: ron.dror@stanford.edu (R.O.D.); arthur.christopoulos@monash.edu (A.C.); celine.valant@monash.edu (C.V.); david.thal@monash.edu (D.M.T.)

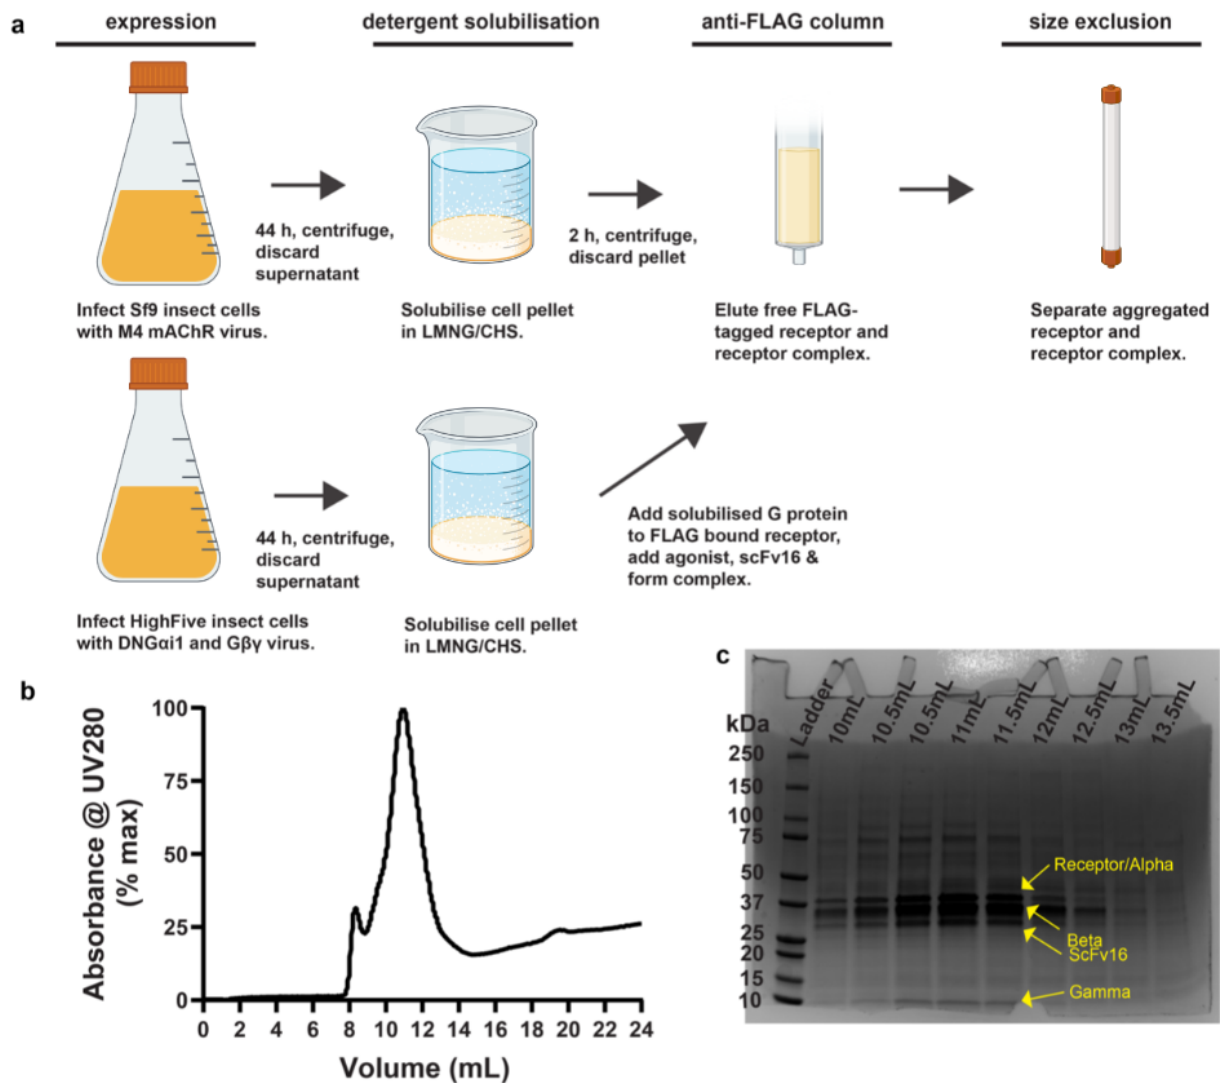

**Supplementary Figure 1. Purification of the xano-M<sub>4</sub>R-G<sub>i</sub> complex.** (a) Purification flow chart of the xano-M<sub>4</sub>R-G<sub>i</sub> complex. (b) Elution profile of the xano-M<sub>4</sub>R-G<sub>i</sub> complex in size exclusion chromatography using a Superdex 200 Increase 10/30 and (c) Coomassie staining of SDS-PAGE gel (uncropped) with the corresponding SEC fractions. Created with BioRender.com.

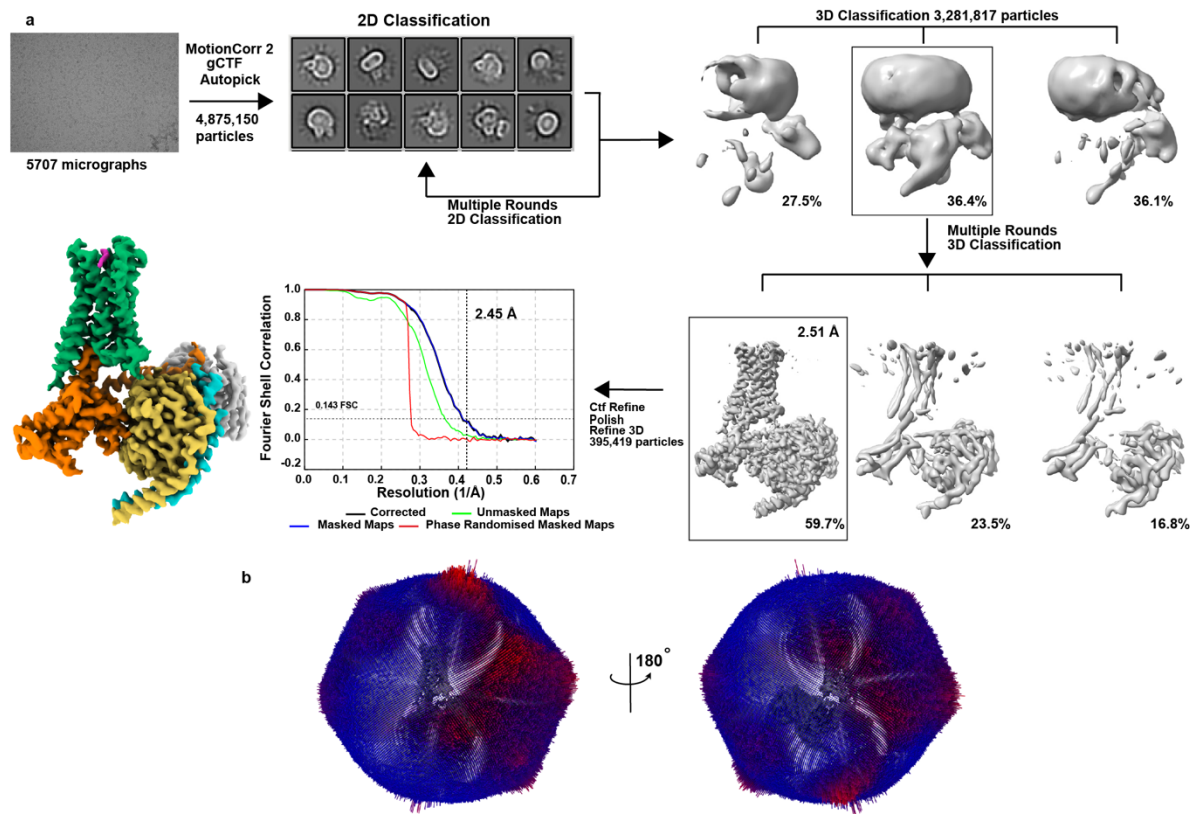

**Supplementary Figure 2. Cryo-EM data processing for the xano-M<sub>4</sub>R-G<sub>i</sub> complex. (a)** Flow chart for cryo-EM analysis as described in methods leading to final cryo-EM density maps at a resolution of 2.45 Å. **(b)** Angular distribution of particles projections overlaid onto final map.

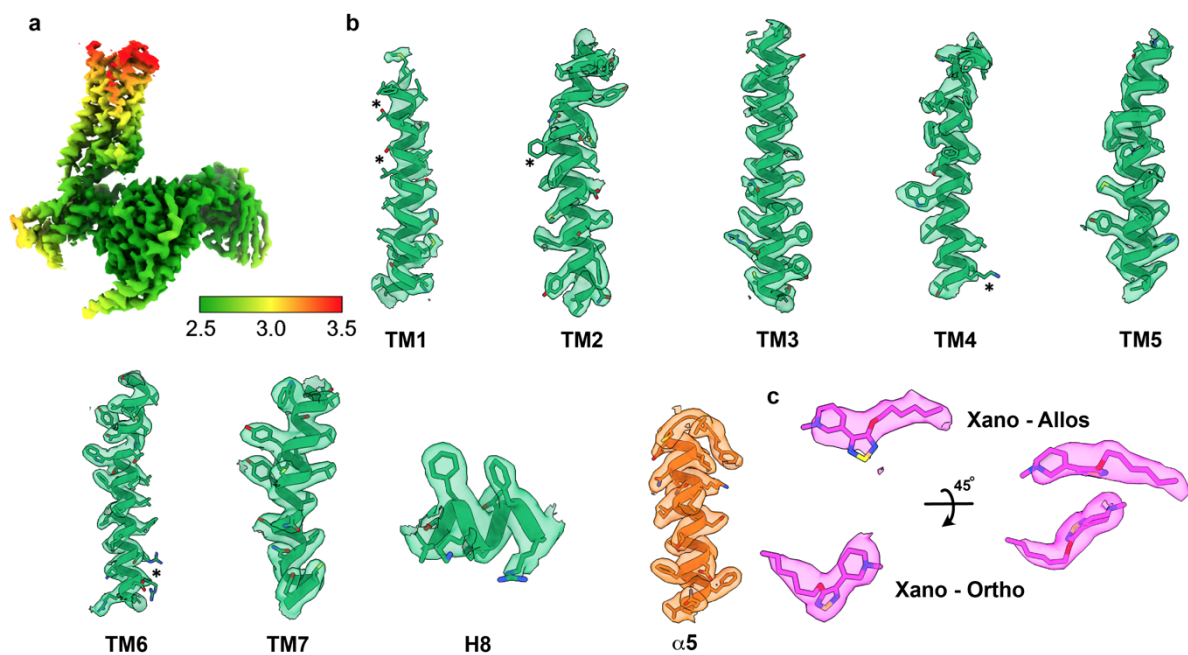

**Supplementary Figure 3. Cryo-EM density maps.** (a) Local resolution map of the xano-M<sub>4</sub>R-G<sub>i</sub> complex calculated in RELION 3.1. (b) Shown as cartoons are representative regions of the transmembrane domains of the M<sub>4</sub> mAChR and the α5 of G<sub>i1</sub> modeled into the cryo-EM map, which is shown as a transparent surface contoured at 0.026. (c) Shown in stick representation coloured by heteroatom are xanomeline as found in the orthosteric and allosteric sites with two different points of view. The cryo-EM map is shown as a transparent surface contoured at 0.026. Some residues were not well-supported with EM density beyond the β-carbon and were left fully modelled (labelled with \*).

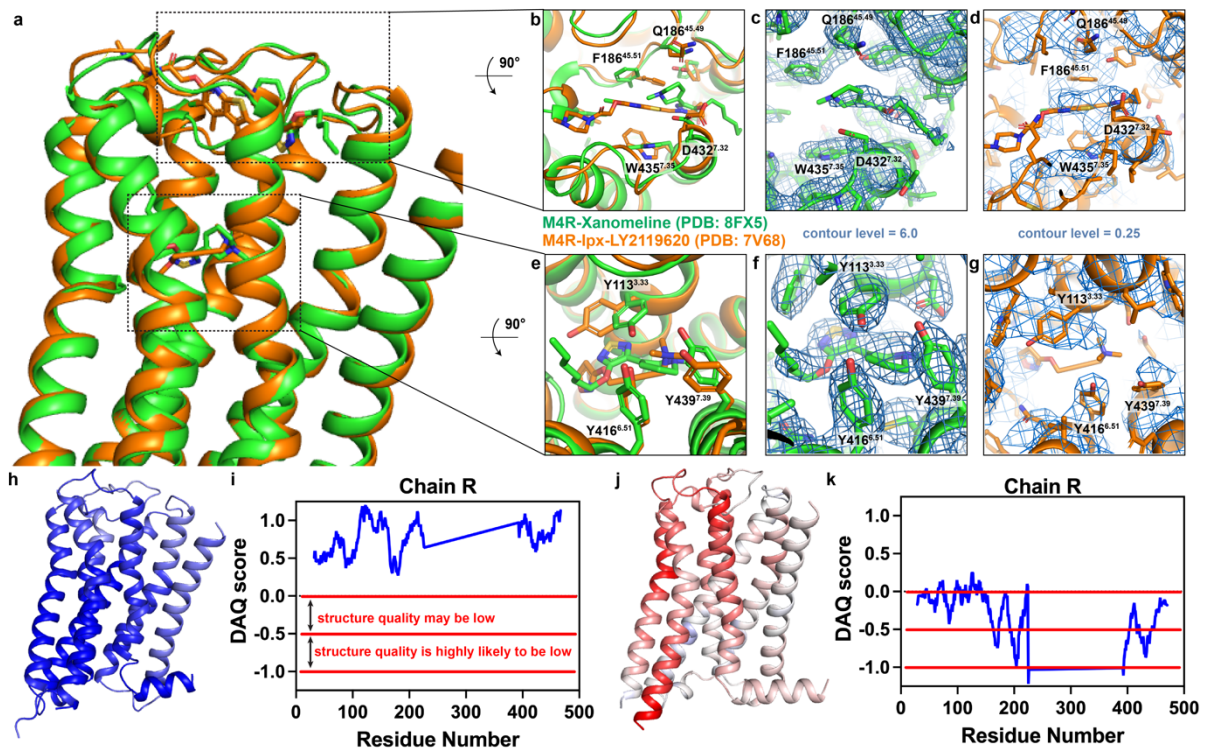

**Supplementary Figure 4. Comparison of M<sub>4</sub> mAChR cryo-EM structures. (a)** Comparison of the xano-M<sub>4</sub>R-G<sub>i1</sub> complex (green) and the LY2119620-IPX-M<sub>4</sub>R-G<sub>i1</sub> complex (PDB: 7V68, orange). **(b)** View of the allosteric site comparing the position of key allosteric residues F186 and W435. Comparison of EM density of the corresponding allosteric binding site residues from **(c)** the xano-M<sub>4</sub>R-G<sub>i1</sub> complex at a map contour of 6.0 and **(d)** the LY2119620-IPX-M<sub>4</sub>R-G<sub>i1</sub> complex at a map contour of 0.25. **(e)** View of the orthosteric site comparing the position of tyrosine lid residues Y113, Y416, and Y439. Comparison of EM density of the orthosteric binding site residues of **(f)** the xano-M<sub>4</sub>R-G<sub>i1</sub> complex at a map contour of 6.0 and **(g)** the LY2119620-IPX-M<sub>4</sub>R-G<sub>i1</sub> complex at a map contour of 0.25. **(h-k)** A Deep-learning-based residue-wise Quality Assessment score for cryo-EM models (DAQ-score) of **(h,i)** the xano-M<sub>4</sub>R-G<sub>i1</sub> complex and **(j,k)** the LY2119620-IPX-M<sub>4</sub>R-G<sub>i1</sub> complex. A DAQ-score that is positive (coloured blue at values of 1) indicates a correct assignment. A DAQ-score near 0 (coloured white) indicates a position in the map that lacks a distinct density pattern for the assigned amino acid. DAQ-scores less than 0 (coloured red at -1) indicate a position that could be misassigned or poorly fit. **(h,j)** DAQ scores mapped onto the corresponding receptor model by colour. **(i,k)** DAQ scores plotted residue by residue each C $\alpha$  atom.

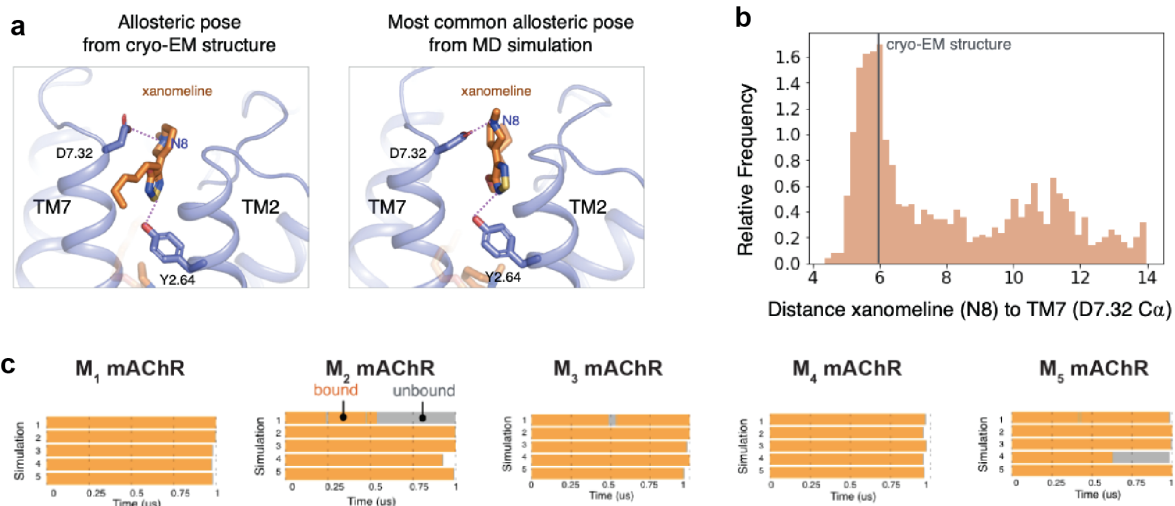

**Supplementary Figure 5. Xanomeline binding to the allosteric site of mAChRs in MD simulations.** (a) In MD simulations of spontaneous binding to the allosteric site, xanomeline occupies a similar location to that observed in the cryo-EM structure, forming interactions with TM7 and TM2. A representative snapshot of the most common pose from MD simulations is shown at right in comparison to the cryo-EM structure at left. (b) The orientation of the xanomeline molecule with respect to the allosteric site was quantified by measuring the distance between xanomeline's tertiary amine (N8) to the Ca of residue D432<sup>7,32</sup> on TM7. The histogram is over simulation frames from five independent simulations of spontaneous binding (specifically, all frames in which xanomeline is bound to the allosteric site; see Methods). The most frequent distance in simulation matches the distance observed in the cryo-EM structure (vertical grey line). (c) In MD simulations, xanomeline stays bound to the allosteric site at the remaining mAChR subtypes for similar durations. A xanomeline molecule was placed into the orthosteric and allosteric binding site, similar to the poses observed in the cryo-EM structure, and simulations then initiated to measure the duration of binding of xanomeline at the allosteric site. Each horizontal bar represents an independent simulation, and shows when the allosteric site is vacant (grey) or occupied (orange) by xanomeline (see Methods).

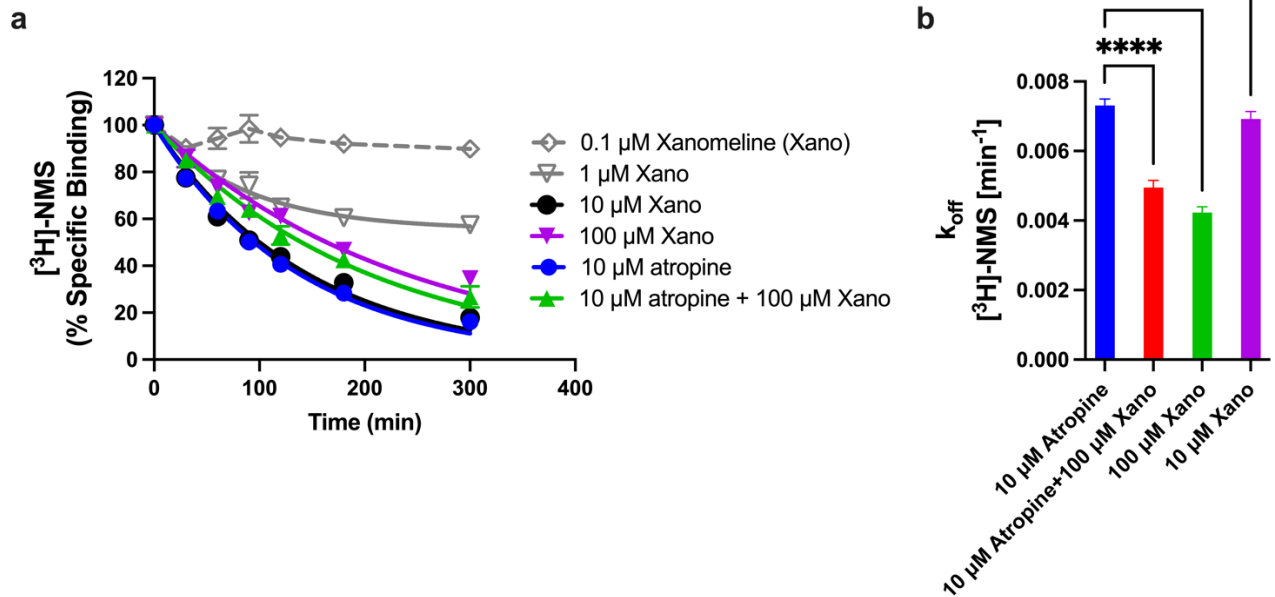

**Supplementary Figure 6. Xanomeline binds to both the orthosteric and allosteric site in [<sup>3</sup>H]-NMS dissociation experiments (a)** [<sup>3</sup>H]-NMS dissociation via isotopic dilution with increasing concentrations of xanomeline alone, atropine (10 μM) alone, or the combination of atropine (10 μM) and xanomeline (100 μM). Data points represent the mean ± S.E.M. of four individual experiments performed in duplicate. Data were fitted to a one-phase exponential decay model with the exception of the binding observed in the presence of the lowest concentration of xanomeline (0.1 μM). **(b)** [<sup>3</sup>H]-NMS dissociation rate constants ( $k_{off}$ ;  $\text{min}^{-1}$ ) derived from the indicated experiments in panel (A). \*\*\*\* denotes  $k_{off}$  values that are statistically significantly different from the control value determined in the presence of 10 μM atropine ( $p < 0.0001$ ; one-way ANOVA followed by Dunnett's multiple comparison test).

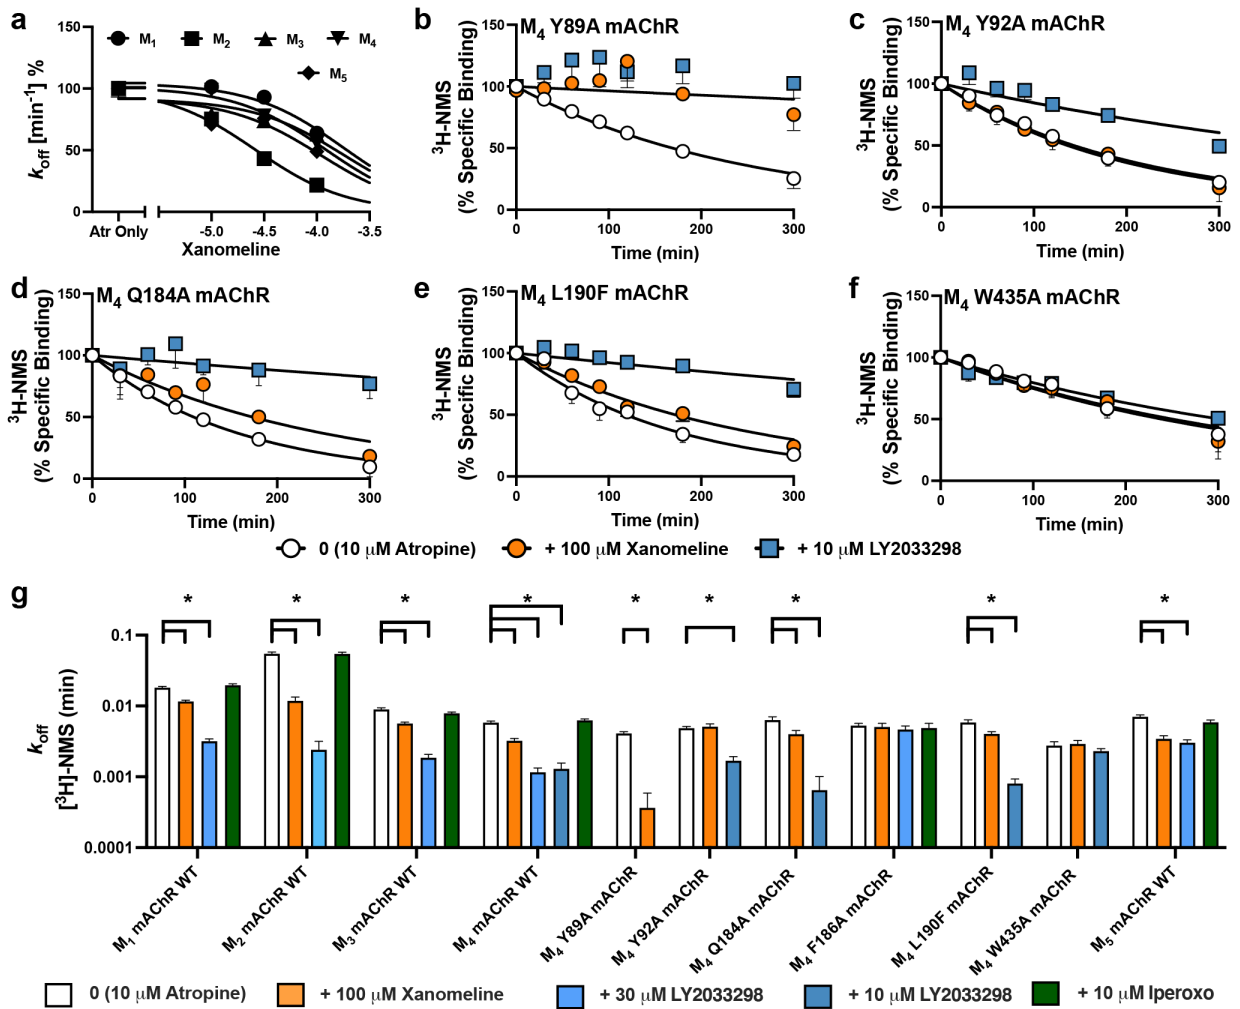

**Supplementary Figure 7. <sup>3</sup>H]-NMS dissociation experiments at all mAChR subtypes and M<sub>4</sub> mAChR point mutants.** (a) Dissociation rate constants ( $k_{off}$ ;  $\text{min}^{-1}$ ) of <sup>3</sup>H]-NMS as a function of xanomeline concentration. Data represent the mean  $\pm$  S.E.M. of five to twelve individual experiments performed in duplicate, M<sub>1</sub> mAChR;  $n = 6$ , M<sub>2</sub> mAChR;  $n = 10$ , M<sub>3</sub> mAChR;  $n = 7$ , M<sub>4</sub> mAChR;  $n = 12$ , M<sub>5</sub> mAChR;  $n = 5$ . Curves represent the global fit of a three-parameter logistic equation to the data points. (b-f) <sup>3</sup>H]-NMS dissociation via isotopic dilution with 10  $\mu\text{M}$  atropine alone (0), or in the presence (+), of 100  $\mu\text{M}$  xanomeline or 10  $\mu\text{M}$  LY2033298 at the (b) M<sub>4</sub> Y89A mAChR, (c) M<sub>4</sub> Y92A mAChR, (d) M<sub>4</sub> Q184A mAChR, (e) M<sub>4</sub> L190F mAChR, (f) M<sub>4</sub> W435A mAChR mutants. Data points represent the mean  $\pm$  S.E.M. of four to five individual experiments performed in duplicate. For (b-f), 10  $\mu\text{M}$  atropine alone & + 100  $\mu\text{M}$  xanomeline  $n = 5$ , + 10  $\mu\text{M}$  LY2033298  $n = 4$ . Data were fitted to a one-phase exponential decay model. (g) Dissociation rate constants ( $k_{off}$ ;  $\text{min}^{-1}$ ) of <sup>3</sup>H]-NMS in the presence of 10  $\mu\text{M}$  atropine alone (0) or in combination (+) with 10  $\mu\text{M}$  iperoxo, 10  $\mu\text{M}$  LY2033298, 30  $\mu\text{M}$  LY2033298 or 100  $\mu\text{M}$  xanomeline at all characterised WT and mutant mAChRs. M<sub>1</sub> mAChR; 10  $\mu\text{M}$  atropine alone & + 10  $\mu\text{M}$  iperoxo & + 100  $\mu\text{M}$  xanomeline  $n = 6$ , + 30  $\mu\text{M}$  LY2033298  $n = 3$ . M<sub>2</sub> mAChR; 10  $\mu\text{M}$  atropine alone  $n = 10$ , + 10  $\mu\text{M}$  iperoxo & + 30  $\mu\text{M}$  LY2033298 & + 100  $\mu\text{M}$  xanomeline  $n = 6$ . M<sub>3</sub> mAChR; 10  $\mu\text{M}$  atropine alone & + 10  $\mu\text{M}$  iperoxo & + 100  $\mu\text{M}$  xanomeline  $n = 7$ , + 30  $\mu\text{M}$  LY2033298  $n = 6$ . M<sub>4</sub> mAChR wild type; 10  $\mu\text{M}$  atropine alone  $n = 14$ , + 10  $\mu\text{M}$  iperoxo  $n = 5$ , + 30  $\mu\text{M}$  LY2033298  $n = 7$ , + 10  $\mu\text{M}$  LY2033298  $n = 4$ , + 100  $\mu\text{M}$  xanomeline  $n = 13$ . M<sub>4</sub> Y89A, Y92A, Q184A, L190F, W435A mAChR; 10  $\mu\text{M}$  atropine alone & + 100  $\mu\text{M}$  xanomeline  $n$



= 5, + 10  $\mu$ M LY2033298  $n = 4$ . M<sub>4</sub> F186<sup>ECL2</sup>A; 10  $\mu$ M atropine alone  $n = 4$ , + 10  $\mu$ M iperoxo & + 30  $\mu$ M LY2033298 & + 100  $\mu$ M xanomeline  $n = 3$ . M<sub>5</sub> mAChR; 10  $\mu$ M atropine alone & + 10  $\mu$ M iperoxo & + 100  $\mu$ M xanomeline  $n = 5$ , + 30  $\mu$ M LY2033298  $n = 4$ . \* denotes values that were statistically significantly different from the control value determined in the presence of 10  $\mu$ M atropine alone ( $p < 0.05$ ; one-way ANOVA and Dunnett's multiple comparison test).

---

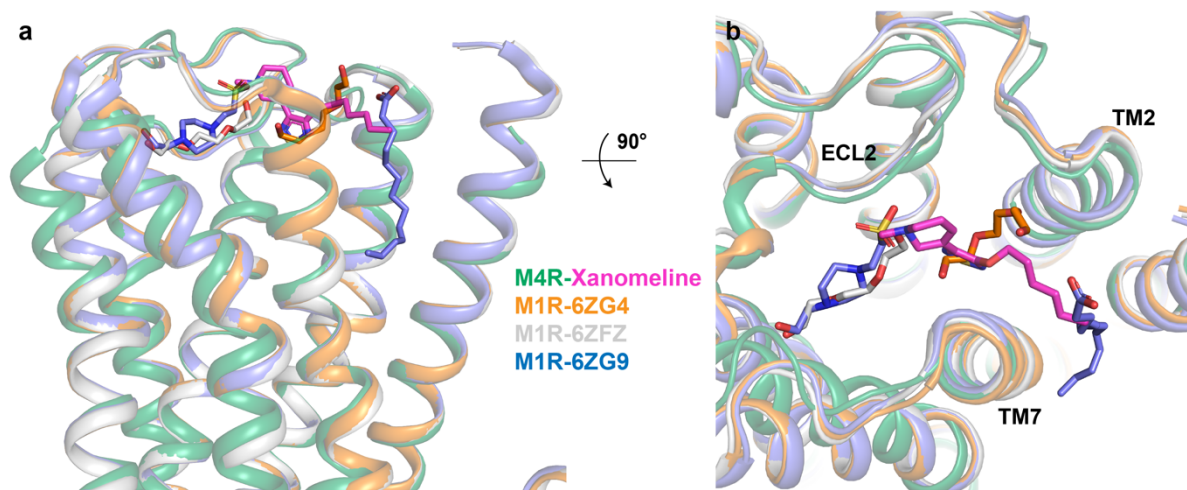

---

**Supplementary Figure 8. Comparison of M<sub>1</sub> and M<sub>4</sub> mAChR allosteric sites.** Comparison of the xanomeline (magenta sticks) bound allosteric site at the M<sub>4</sub> mAChR to the allosteric site of the recent M<sub>1</sub> mAChR structures (PDB: 6ZG4, 6ZFZ, 6ZG9) where polyethylene glycol (PEG) (orange and grey sticks), HEPES (blue sticks) or oleic acid (blue sticks) molecules were observed bound in, and around, the allosteric binding site.

---

**Supplementary Table 1 | Cryo-EM data collection and refinement statistics**

| <b>Data Collection</b>                             | <b>M<sub>4</sub>Δ<sub>ICL3</sub>mAChR/dnG<sub>i1</sub>/scFv16/Xanomeline</b> |
|----------------------------------------------------|------------------------------------------------------------------------------|
| <b>Micrographs</b>                                 | 5707                                                                         |
| <b>Electron dose (e<sup>-</sup>/Å<sup>2</sup>)</b> | 0.738                                                                        |
| <b>Voltage (kV)</b>                                | 300                                                                          |
| <b>Pixel size (Å)</b>                              | 0.83                                                                         |
| <b>Defocus range (μM)</b>                          | 0.5-1.5                                                                      |
| <b>Symmetry Imposed</b>                            | C1                                                                           |
| <b>Particles (final map)</b>                       | 395419                                                                       |
| <b>Resolution (0.143 FSC) (Å)</b>                  | 2.45                                                                         |
| <b>Refinement</b>                                  |                                                                              |
| <b>CCmap_model</b>                                 | 0.90                                                                         |
| <b>Map Sharpening B factor (Å<sup>2</sup>)</b>     | -10                                                                          |
| <b>Model Quality</b>                               |                                                                              |
| <b>R.m.s deviations</b>                            |                                                                              |
| <b>Bond Length (Å)</b>                             | 0.004                                                                        |
| <b>Bond angles (°)</b>                             | 0.824                                                                        |
| <b>Ramachandran</b>                                |                                                                              |
| <b>Favoured (%)</b>                                | 98.02                                                                        |
| <b>Outliers (%)</b>                                | 0.00                                                                         |
| <b>Rotamer outliers (%)</b>                        | 0.11                                                                         |
| <b>C-Beta deviations (%)</b>                       | 0.00                                                                         |
| <b>Clashscore</b>                                  | 2.4                                                                          |
| <b>MolProbity score</b>                            | 1.02                                                                         |

**Supplementary Table 2 | [<sup>3</sup>H]-NMS dissociation radioligand binding at mAChR WT and mutants**

|                                  | <sup>3</sup> H]-NMS dissociation rate ( $k_{off}$ ) <sup>a</sup> |                     |                      |                        |                      |                      |                       | pIC <sub>50</sub> <sup>b</sup> |
|----------------------------------|------------------------------------------------------------------|---------------------|----------------------|------------------------|----------------------|----------------------|-----------------------|--------------------------------|
|                                  | 10 μM Atropine                                                   | + 10 μM Iperoxo     | + 30 μM LY2033298    | + 10 μM LY2033298      | + 10 μM Xanomeline   | + 30 μM Xanomeline   | + 100 μM Xanomeline   |                                |
| <b>M<sub>1</sub> mAChR WT</b>    | 0.0182 ± 0.0007 (6)                                              | 0.0196 ± 0.0009 (6) | 0.0032 ± 0.0003 (3)* | N.D.                   | 0.0185 ± 0.0007 (6)  | 0.0169 ± 0.0008 (6)  | 0.0116 ± 0.0005 (6)*  | 3.75 ± 0.04 (6)                |
| <b>M<sub>2</sub> mAChR WT</b>    | 0.055 ± 0.003 (10)                                               | 0.054 ± 0.003 (6)   | 0.0024 ± 0.0008 (6)* | N.D.                   | 0.041 ± 0.003 (6)*   | 0.024 ± 0.003 (6)*   | 0.012 ± 0.002 (6)*    | 4.58 ± 0.03 (10)               |
| <b>M<sub>3</sub> mAChR WT</b>    | 0.0089 ± 0.0005 (7)                                              | 0.0079 ± 0.0003 (7) | 0.0019 ± 0.0002 (6)* | N.D.                   | 0.0070 ± 0.0004 (7)* | 0.0066 ± 0.0003 (7)* | 0.0056 ± 0.0003 (7)*  | 3.74 ± 0.07 (7)                |
| <b>M<sub>4</sub> mAChR WT</b>    | 0.0058 ± 0.0003 (14)                                             | 0.0063 ± 0.0003 (5) | 0.0012 ± 0.0002 (7)* | 0.0013 ± 0.0003 (4)*   | 0.0057 ± 0.0003 (6)  | 0.0045 ± 0.0003 (8)* | 0.0032 ± 0.0002 (13)* | 3.92 ± 0.03 (12)               |
| <b>M<sub>4</sub> mAChR Y89A</b>  | 0.0041 ± 0.0002 (5)                                              | N.D.                | N.D.                 | <i>Can't calculate</i> | N.D.                 | N.D.                 | 0.0004 ± 0.0002 (5)*  | N.D.                           |
| <b>M<sub>4</sub> mAChR Y92A</b>  | 0.0049 ± 0.0003 (5)                                              | N.D.                | N.D.                 | 0.0017 ± 0.0002 (4)*   | N.D.                 | N.D.                 | 0.0051 ± 0.0005 (5)   | N.D.                           |
| <b>M<sub>4</sub> mAChR Q184A</b> | 0.0063 ± 0.0007 (5)                                              | N.D.                | N.D.                 | 0.0006 ± 0.0004 (4)*   | N.D.                 | N.D.                 | 0.0040 ± 0.0005 (5)*  | N.D.                           |
| <b>M<sub>4</sub> mAChR F186A</b> | 0.0053 ± 0.0004 (4)                                              | 0.0049 ± 0.0008 (3) | 0.0046 ± 0.0006 (3)  | N.D.                   | N.D.                 | 0.0051 ± 0.0006 (3)  | 0.0051 ± 0.0006 (3)   | N.D.                           |
| <b>M<sub>4</sub> mAChR L190F</b> | 0.0059 ± 0.0005 (5)                                              | N.D.                | N.D.                 | 0.0008 ± 0.0001 (4)*   | N.D.                 | N.D.                 | 0.0040 ± 0.0003 (5)*  | N.D.                           |
| <b>M<sub>4</sub> mAChR W435A</b> | 0.0028 ± 0.0004 (5)                                              | N.D.                | N.D.                 | 0.0023 ± 0.0002 (4)    | N.D.                 | N.D.                 | 0.0029 ± 0.0004 (5)   | N.D.                           |
| <b>M<sub>5</sub> mAChR WT</b>    | 0.0070 ± 0.0005 (5)                                              | 0.0059 ± 0.0004 (5) | 0.0030 ± 0.0003 (4)* | N.D.                   | 0.0049 ± 0.0004 (5)* | 0.0053 ± 0.0005 (5)* | 0.0034 ± 0.0004 (5)*  | 3.96 ± 0.09 (5)                |

Data represent the mean ± S.E.M. of (n) independent experiments performed in duplicate. N.D. not determined. \* significantly different from 10 μM Atropine condition,  $p < 0.05$ , one-way ANOVA with Dunnett's multiple comparisons test.

<sup>a</sup> Specific binding data were fit to a single exponential decay to calculate the dissociation rate constants ( $k_{off}$  in min<sup>-1</sup>).

<sup>b</sup> Dissociation rate constants of [<sup>3</sup>H]-NMS in the presence of xanomeline were fit to a three-parameter logistic equation to derive a pIC<sub>50</sub> inhibitory constant.
